# Supplementary material for: Factors affecting voriconazole pharmacokinetic variability in critically ill patients: a systematic review
Source: Research Square preprint supplement (doi:10.21203/rs.3.rs-6964492/v1), 2025-07-07
Supplement: Supplementary file 1 [file 855831dad188d5f0a13ac3c7.docx]

**Appendix 1: Electronic Search Strategies.**

Databases searched :

- PubMed/Medline
- Web of Science
- Cochrane Central Register of Controlled Trials (CENTRAL)

**Pubmed/MEDLINE**

Date of search : 01/11/2023

Search number 16 was investigated. No search were performed using “weight”, “obesity”, “inflammation”, “crp”, “pct”, or “genotype” due their lack of specificity towards the ICU. Their search was included in search “1 AND 4”.

| Number | Search strategy | Results |
| --- | --- | --- |
| 1 | Voriconazole | 8 296 |
| 2 | Critically | 1 238 371 |
| 3 | ICU | 173 075 |
| 4 | 2 OR 3 | 1 343 698 |
| 5 | ECMO | 22 459 |
| 6 | Extracorporeal | 59 708 |
| 7 | Renal replacement | 35 055 |
| 8 | Filtration | 196 103 |
| 9 | Dialysis | 213 147 |
| 10 | SOFA | 5 972 |
| 11 | Feeding tube | 37 310 |
| 12 | Nasogastric tube | 6 590 |
| 13 | 5 OR 6 OR 7 OR 8 OR 9 OR 10 OR 11 OR 12 | 513 287 |
| **14** | **1 AND 4** | **676** |
| **15** | **1 AND 13** | **189** |
| **16** | **1 AND (4 OR 13)** | **854** |

**Cochrane Library**

Date of search : 10/11/2023

| Number | Search strategy : voriconazole + | Results |
| --- | --- | --- |
| 1 | Critically | 11 |
| 2 | ICU | 9 |
| 3 | ECMO | 0 |
| 4 | Extracorporeal | 1 |
| 5 | Renal replacement | 5 |
| 6 | Filtration | 3 |
| 7 | Dialysis | 3 |
| 8 | SOFA | 1 |
| 9 | Feeding tube | 1 |
| 10 | Nasogastric tube | 1 |
|  | **TOTAL** | **35** |

**Web of science library:**

Date of search : 01/11/2023

Search number 16 was investigated.

| Number | Search strategy | Results |
| --- | --- | --- |
| 1 | Voriconazole | 10 946 |
| 2 | Critically | 294 871 |
| 3 | ICU | 95 085 |
| 4 | 2 OR 3 | 1 343 698 |
| 5 | ECMO | 15 098 |
| 6 | Extracorporeal | 50 791 |
| 7 | Renal replacement | 32 408 |
| 8 | Filtration | 199 670 |
| 9 | Dialysis | 135 650 |
| 10 | SOFA | 8 417 |
| 11 | Feeding tube | 3 587 |
| 12 | Nasogastric tube | 4 906 |
| 13 | 5 OR 6 OR 7 OR 8 OR 9 OR 10 OR 11 OR 12 | 405 124 |
| 14 | 1 AND 4 | 470 |
| 15 | 1 AND 13 | 228 |
| **16** | **1 AND (4 OR 13)** | **627** |

**Appendix 2: quality assessment**

Two authors (AC and MG) independently assessed the risk of bias for each included study by adapting the Scottish Intercollegiate Guidelines Network (SIGN) quality checklists for cohort studies. Internal validity (selection of subjects, assessment of exposure and outcome, confounding, and statistical analysis) and overall study quality for minimizing the risk of bias were assessed by the checklist. The modified SIGN checklist resulted in 12 checklist items. One point was given for each item fulfilled, except for the overall study quality for minimizing the risk of bias: two points for high quality, 1 point for acceptable quality, and zero point for unacceptable quality. No points were given if an item was not fulfilled, not applicable, or sufficient information for assessment was not available. A maximum score of 13 points could be attributed. The studies were considered to have low risk of bias when the score was ≥ 12 points, moderate risk of bias when the score was 8 to 11 points, and high risk of bias when the score was ≤ 7 points.

Quality assessment checklist :

| Section 1. Internal validity | | |
| --- | --- | --- |
| 1.1 | The study addresses an appropriate and clearly focused question | Yes = 1 / No or can't say = 0 |
| Selection of subjects | | |
| 1.2 | The two groups being studied are selected from source populations that are comparable in all respects other than the factor under investigation | Yes = 1 / No or can't say = 0 |
| 1.3 | The study indicates how many of the eligible people were included, in each of the groups being studied | Yes = 1 / No or can't say = 0 |
| 1.4 | The study indicates how many of the eligible people beneficiated from TDM, in each arm of the study | Yes = 1 / No or can't say = 0 |
| 1.5 | Comparison is made between full participants and those who did not beneficiated from TDM, by exposure status | Yes = 1 / No or can't say = 0 |
| Assessment | | |
| 1.6 | The outcomes are clearly defined | Yes = 1 / No or can't say = 0 |
| 1.7 | The assessment of outcome is made blind to exposure status | Yes = 1 / No or can't say = 0 |
| 1.8 | The method of assessment of exposure is reliable | Yes = 1 / No or can't say = 0 |
| 1.9 | A validated method of voriconazole concentration measurement was used | Yes = 1 / No or can't say = 0 |
| Confunding | | |
| 1.10 | The main potential confounders are identified and taken into account in the design and analysis | Yes = 1 / No or can't say = 0 |
| Statistical analysis | | |
| 1.11 | Confidence interval have been provided | Yes = 1 / No or can't say = 0 |
| Section 2. Overall assessment of the study |  | |
| 2.1 | How well was the study done to minimize the risk of bias or confounding? | High quality = 2 / Acceptable quality = 1 / Unacceptable quality = 0 |
